# Supplementary material for: Limited prolonged effects of rifaximin treatment on irritable bowel syndrome-related differences in the fecal microbiome and metabolome
Source: PubMed Central journal article supplement — Gut Microbes. 2016 Jul 26;7(5):397–413. doi: 10.1080/19490976.2016.1215805 (PMC5046165; doi:10.1080/19490976.2016.1215805), 2016-07-26
Supplement: kgmi-07-05-1215805-s001.pdf [file kgmi-07-05-1215805-s001.pdf]

## Supplementary Information

### **Irritable bowel syndrome-related differences in the fecal microbiome and metabolome are not affected by short-term improvement after the rifaximin treatment**

Natalia Zeber-Lubecka<sup>1#</sup>, Maria Kulecka<sup>1#</sup>, Filip Ambrozkiwicz<sup>1</sup>, Agnieszka Paziewska<sup>1</sup>, Krzysztof Goryca<sup>2</sup>, Jakub Karczmarzski<sup>2</sup>, Tymon Rubel<sup>3</sup>, Wojciech Wojtowicz<sup>4</sup>, Piotr Mlynarz<sup>4</sup>, Lukasz Marczak<sup>5</sup>, Roman Tomecki<sup>1</sup>, Michal Mikula<sup>2</sup>, Jerzy Ostrowski<sup>1,2,\*</sup>

<sup>1</sup> Department of Gastroenterology, Hepatology and Clinical Oncology, Medical Center for Postgraduate Education; Warsaw, Poland

<sup>2</sup> Department of Genetics, Maria Sklodowska-Curie Memorial Cancer Center and Institute of Oncology; Warsaw, Poland

<sup>3</sup> Institute of Radioelectronics, Warsaw University of Technology, Warsaw, Poland

<sup>4</sup> Department of Bioorganic Chemistry Wroclaw University of Technology, Wroclaw, Poland

<sup>5</sup> Institute of Bioorganic Chemistry Polish Academy of Sciences, Poznań, Poland

#equal contribution

\*corresponding author

Jerzy Ostrowski, MD, PhD; Cancer Center-Institute, Roentgena 5, 02-781 Warsaw, Poland,

Tel: +48 225462575, Fax: +48 225462449, E-mail: [jostrow@warman.com.pl](mailto:jostrow@warman.com.pl)

**Figure S1.** *Bacteroidetes/Firmicutes* ratios in healthy controls (HCs) and IBS patients before (IBS) and after (Treatment) treatment.

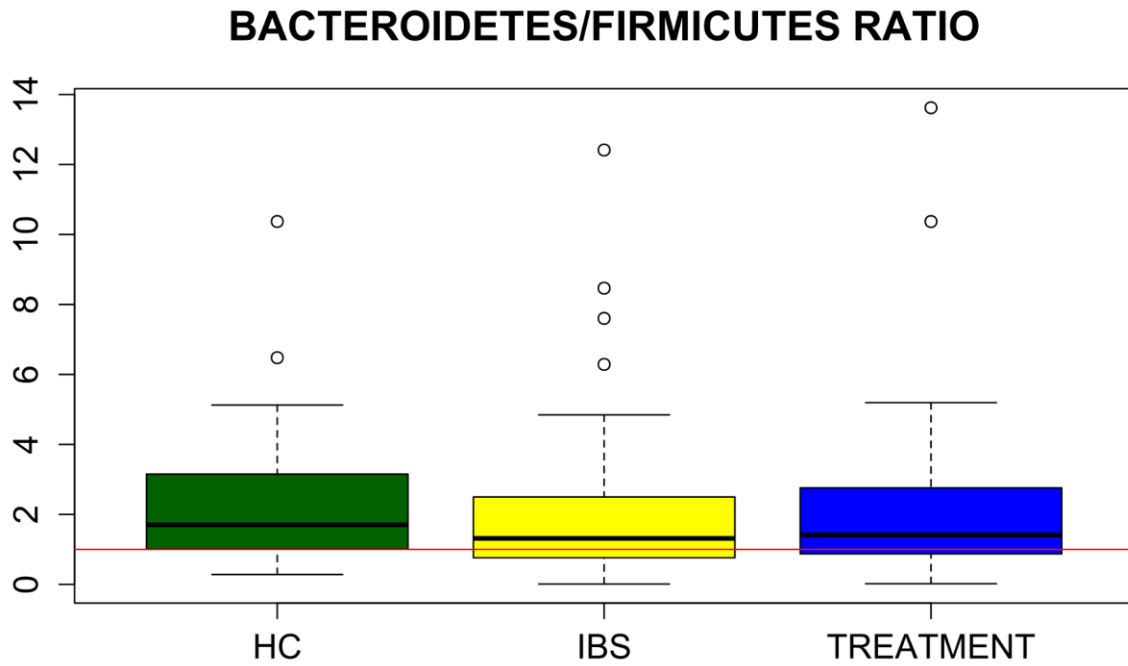

**Figure S2.** PCA plot of IBS patients (D: Diarrhea subgroup; C: Constipation subgroup; M: Mixed symptoms subgroup) before treatment and healthy controls (HC).

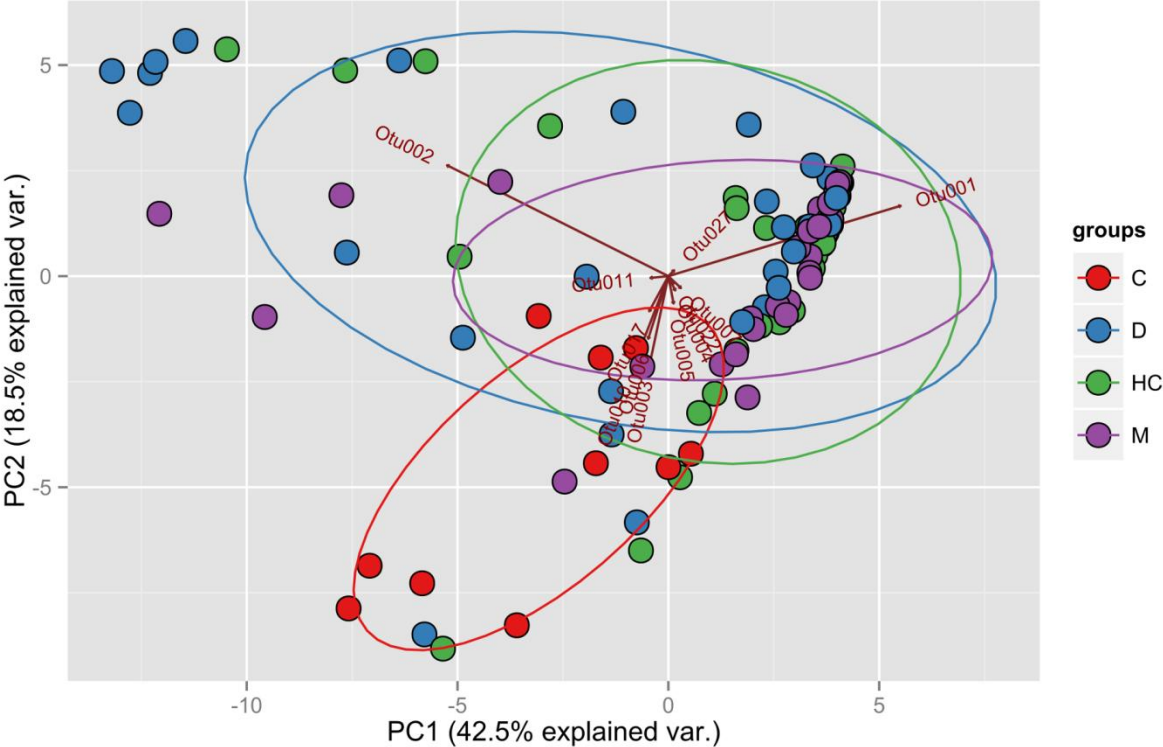

**Figure S3.** PCA plot of IBS patients before treatment and healthy controls on a functional level, based on KEGG pathway assignment to bacterial taxa. IBS subgroup (D: Diarrhea; C: Constipation; M: Mixed symptoms) and healthy controls (HC).

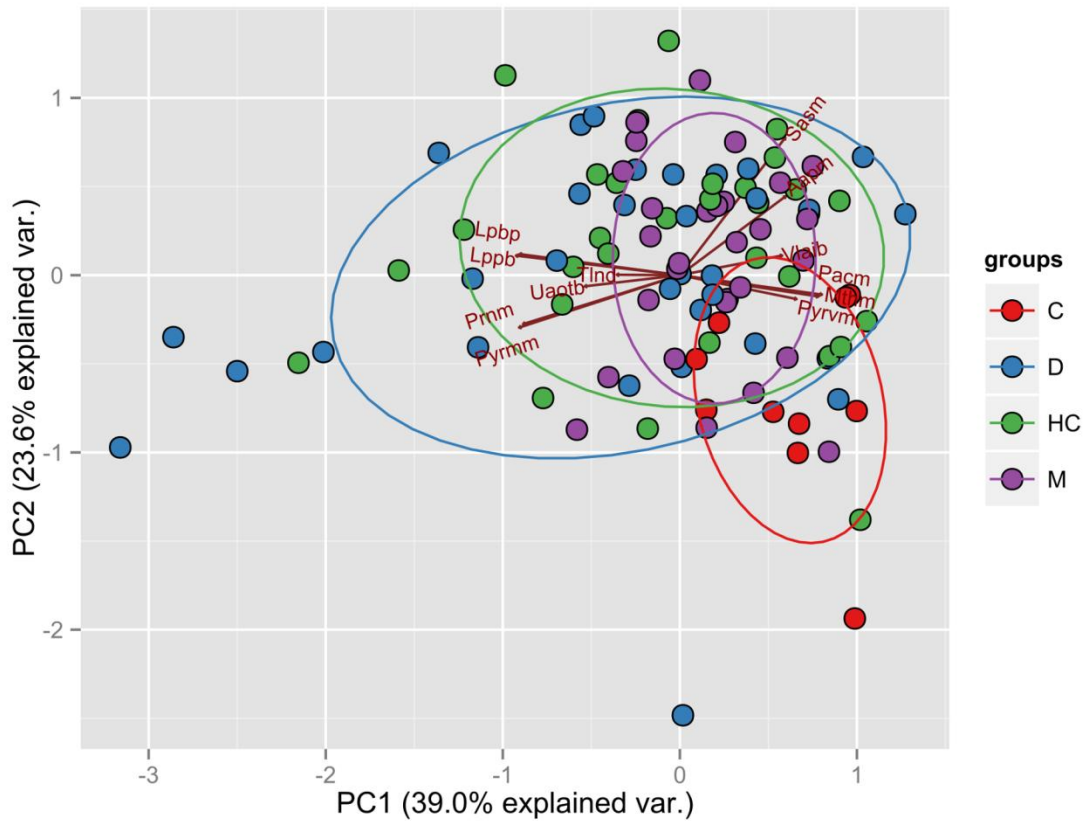

| Pathway                                             | Abbreviation |
|-----------------------------------------------------|--------------|
| Arginine and proline metabolism                     | Aapm         |
| Fructose and mannose metabolism                     | Famm         |
| Lipopolysaccharide biosynthesis                     | Lppb         |
| Lipopolysaccharide biosynthesis proteins            | Lppb         |
| Methane metabolism                                  | Mthm         |
| Peptidoglycan biosynthesis                          | Pptb         |
| Porphyrin and chlorophyll metabolism                | Pacm         |
| Purine metabolism                                   | Prnm         |
| Pyrimidine metabolism                               | Pyrmm        |
| Pyruvate metabolism                                 | Pyrvm        |
| Starch and sucrose metabolism                       | Sasm         |
| Toluene degradation                                 | Tlnd         |
| Ubiquinone and other terpenoid-quinone biosynthesis | Uaotb        |
| Valine, leucine, and isoleucine biosynthesis        | Vlaib        |

**Figure S4.** Boxplot of abundances of 15 of the most abundant metabolic pathways, split by IBS type (including healthy controls). IBS subgroup (D: Diarrhea; C: Constipation; M: Mixed symptoms) and healthy controls (HC).

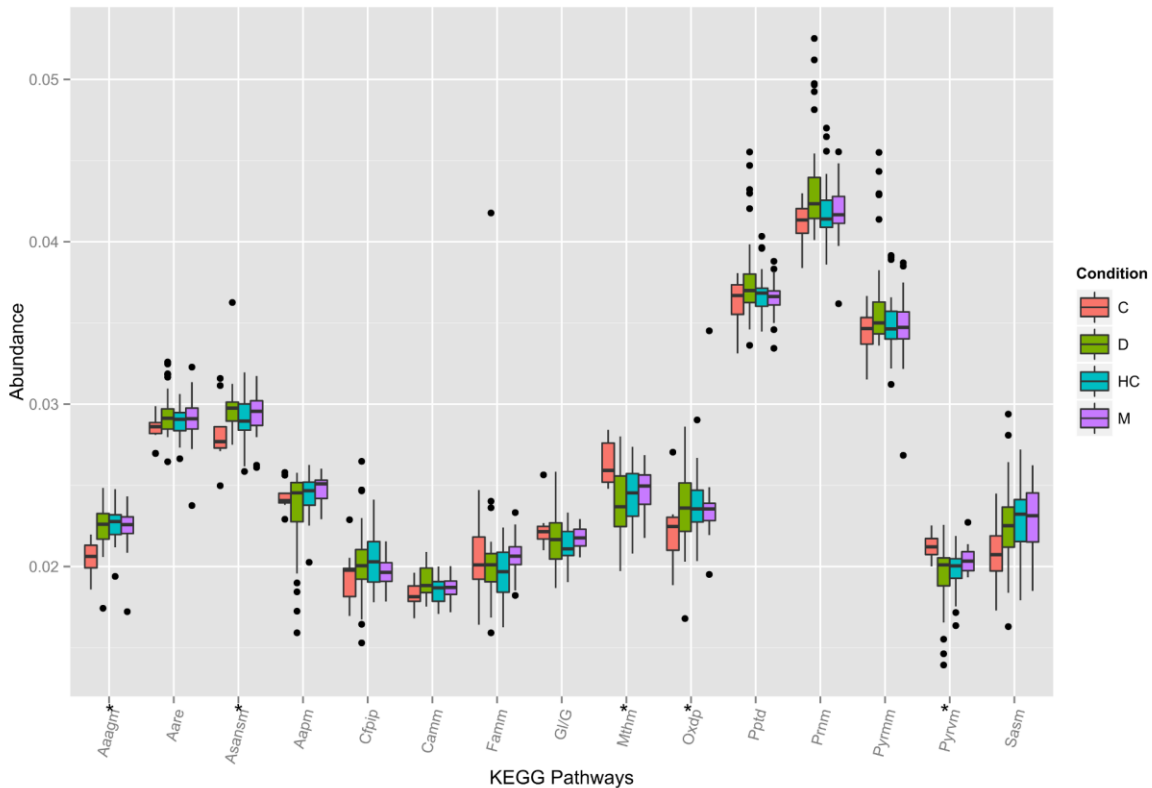

| Pathway                                      | Abbreviation |
|----------------------------------------------|--------------|
| Alanine, aspartate, and glutamate metabolism | Aaagm        |
| Amino acid-related enzymes                   | Aare         |
| Amino sugar and nucleotide sugar metabolism  | Asansm       |
| Arginine and proline metabolism              | Aapm         |
| Carbon fixation pathways in prokaryotes      | Cfpip        |
| Cysteine and methionine metabolism           | Camm         |
| Fructose and mannose metabolism              | Famm         |
| Glycolysis/Gluconeogenesis                   | Gl/G         |
| Methane metabolism                           | Mthm         |
| Oxidative phosphorylation                    | Oxdp         |
| Peptidases                                   | Pptd         |
| Purine metabolism                            | Prnm         |
| Pyrimidine metabolism                        | Pyrmm        |
| Pyruvate metabolism                          | Pyrvm        |
| Starch and sucrose metabolism                | Sasm         |

**Figure S5.** Representative  $^1\text{H}$ NMR spectra of fecal samples in  $\text{CDCl}_3$  at  $300^\circ\text{K}$  in (A) a healthy control (HC) and (B) a patient with IBS

**A**

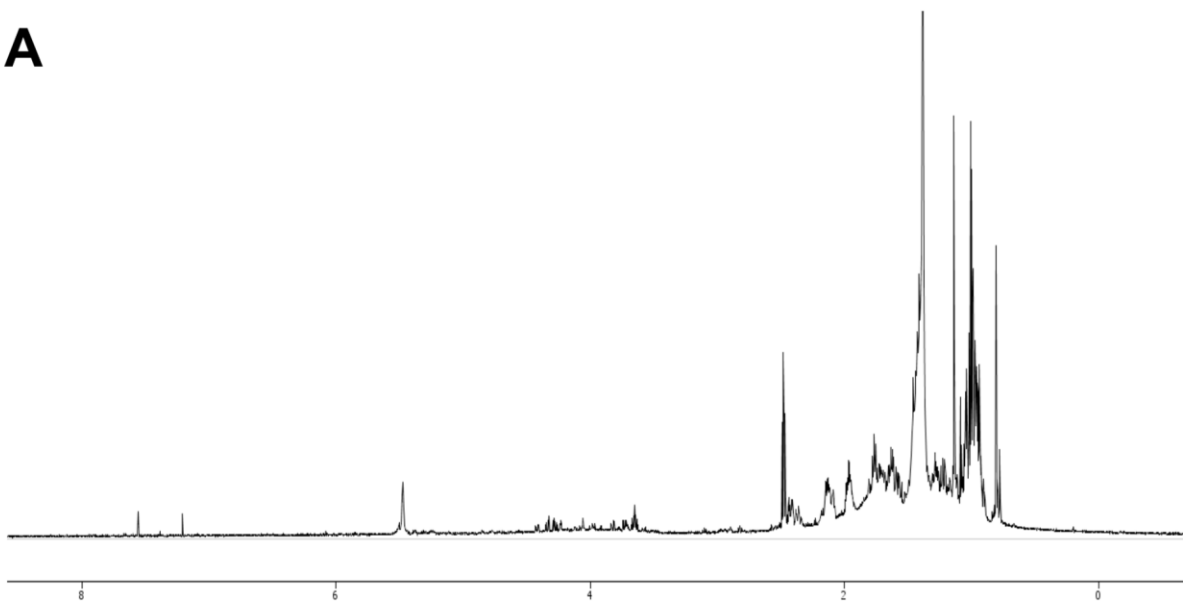

**B**

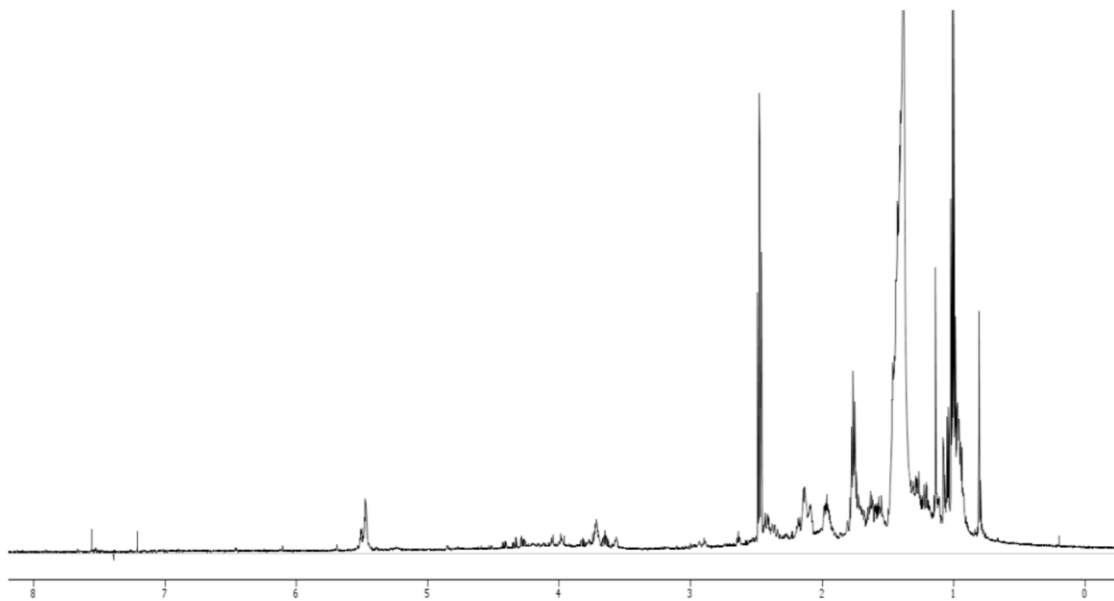

**Figure S6.** Distribution of the GC-MS measurements of samples from healthy controls (HCs) and IBS patients before treatment (IBS-M, IBS-D, and IBS-C) on the plane spanned by the two first principal components. The PC scores were computed for 13 metabolites exhibiting significant pairwise abundance changes between the studied groups (Table S2).

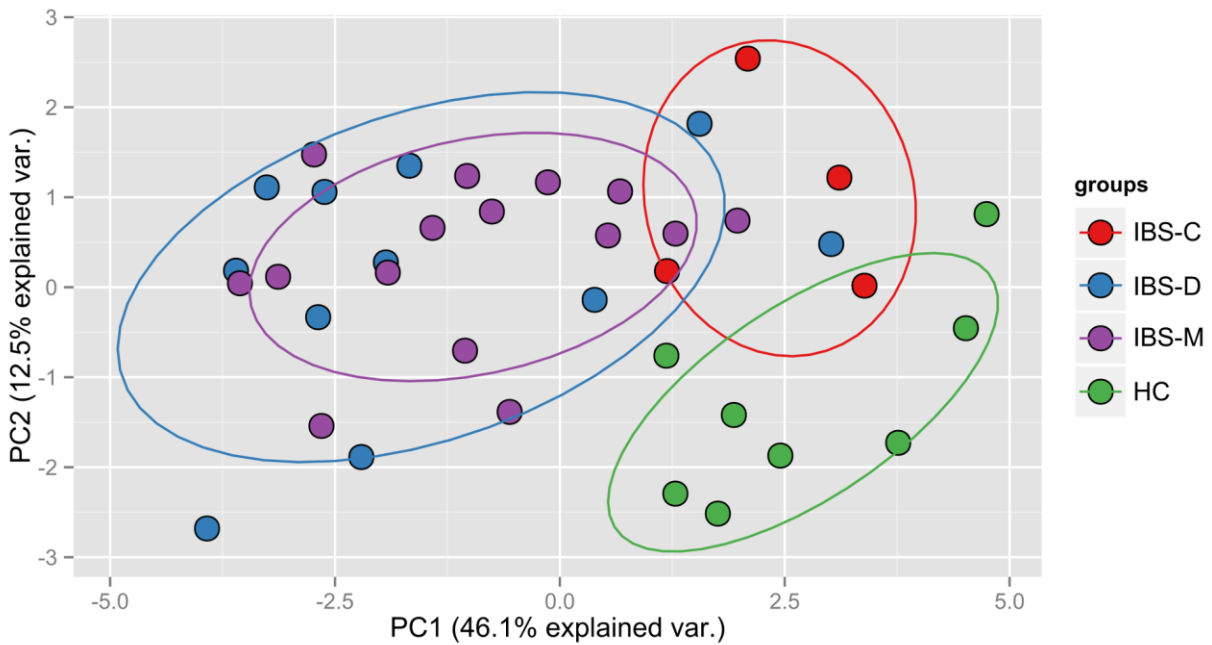

**Figure S7.** Distribution of the GC-MS measurements of samples from healthy controls (HCs) and IBS patients after treatment (IBS-M II, IBS-D II, and IBS-C II) on the plane spanned by the two first principal components. The PC scores were computed for 13 metabolites exhibiting significant pairwise abundance changes between the studied groups (Table S3).

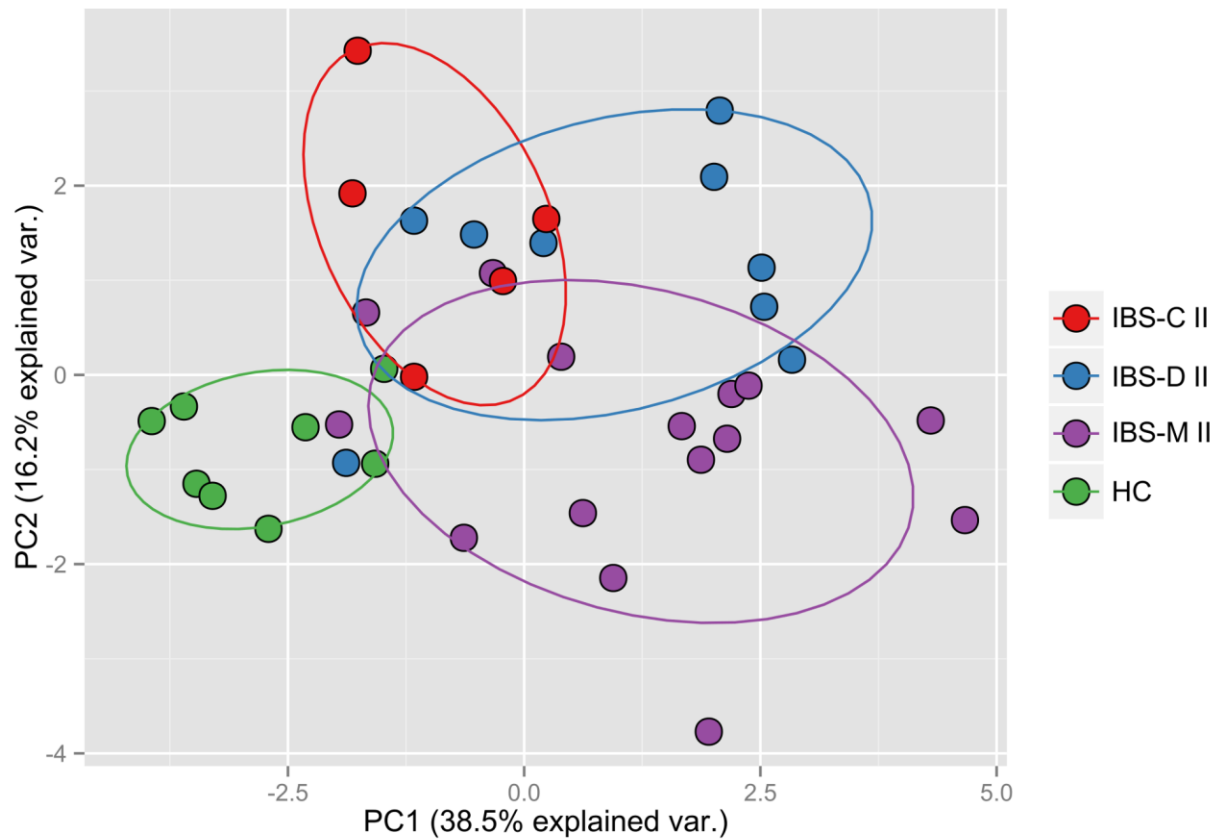



**Table S1.** Partial least-squares-discriminant analysis models obtained from proton nuclear magnetic resonance-based analysis of fecal samples.

| Comparison                    | Sample number | R <sup>2</sup> X(cum) | Q <sup>2</sup> (cum) | p value | Number of latent variables |
|-------------------------------|---------------|-----------------------|----------------------|---------|----------------------------|
| HC vs. IBS I                  | 30            | 0.497                 | 0.372                | 0.02    | 2                          |
| HC vs. IBS II                 | 32            | 0.475                 | 0.109                | 0.71    | 2                          |
| IBS II <sub>n</sub> vs IBS II | 26            | 0.481                 | -0.0931              | 1       | 2                          |
| HC vs. IBS-C II               | 8             | 0.352                 | 0.468                | 0.17    | 1                          |
| HC vs. IBS-D II               | 20            | 0.509                 | 0.207                | 0.45    | 2                          |
| HC vs. IBS-M II               | 20            | 0.549                 | 0.00579              | 1       | 2                          |

**HC:** healthy control; **IBS-D:** Diarrhea subgroup, before treatment (**DI**), after treatment with improvement (**DII**); **IBS-C:** Constipation subgroup, before treatment (**CI**), after treatment with improvement (**CII**); **IBS-M:** Mixed symptoms subgroup, before treatment (**MI**), after treatment with improvement (**MII**); **IBS II<sub>n</sub>:** IBS patients with no improvement; **IBS II:** IBS patients with improvement

**Table S2.** List of 13 metabolites exhibiting significant (FDR,  $\leq 0.1$ , and FC,  $\geq 1.5$ ) differences in abundance between healthy controls (HCs) and the three subgroups of IBS patients before treatment (IBS-M, IBS-D, and IBS-C).

|                                                                                 | ANOVA   | IBS-D vs. HC |       | IBS-M vs. HC |       | IBS-C vs. HC |      | IBS-D vs. IBS-C |      | IBS-M vs IBS-C |      | IBS-D vs IBS-M |      |
|---------------------------------------------------------------------------------|---------|--------------|-------|--------------|-------|--------------|------|-----------------|------|----------------|------|----------------|------|
|                                                                                 | p-value | p-value      | FC    | p-value      | FC    | p-value      | FC   | p-value         | FC   | p-value        | FC   | p-value        | FC   |
| Tocopherol- $\tau$ -tms-derivative                                              | 0.0102  | 0.0029       | 0.28  | 0.0213       | 0.5   |              |      | 0.0024          | 0.14 | 0.0016         | 0.26 | 0.0399         | 0.56 |
| 1H-Indole, 3-methyl-1-(trimethylsilyl)-                                         | 0.0325  | 0.0004       | 4.18  | 0.0053       | 2.6   |              |      | 0.0186          | 3.06 |                |      |                |      |
| N,O-Bis-(trimethylsilyl)phenylalanine                                           | 0.0358  | 0.0024       | 18.34 | 0.0006       | 6.7   |              |      |                 |      |                |      |                |      |
| d-Glucose, 2,3,4,5,6-pentakis-O-(trimethylsilyl)-, $\alpha$ -methyloxyme, (1Z)- | 0.0358  | 0.0052       | 13.01 | 0.0002       | 7.66  |              |      |                 |      |                |      |                |      |
| Pyrimidine, 2,4-bis[(trimethylsilyl)oxy]-                                       | 0.0358  | 0.0017       | 6.96  | 0.0012       | 10.02 |              |      |                 |      |                |      |                |      |
| Eicosanoic acid, trimethylsilyl ester                                           | 0.0358  | 0.0109       | 0.37  | 0.0035       | 0.39  |              |      | 0.0337          | 0.4  | 0.0063         | 0.42 |                |      |
| Silane, tetramethyl-                                                            | 0.0451  |              |       | 0.0018       | 0.5   |              |      |                 |      |                |      | 0.0318         | 1.44 |
| 2-Desoxy-pentos-3-ulose, bis(methoxime),O,O'-bis(trimethylsilyl)-               | 0.0558  | 0.0010       | 0.38  | 0.0001       | 0.4   |              |      |                 |      |                |      |                |      |
| E-2-Hydroxymethylcyclopentanol, di(trimethylsilyl) ether                        | 0.0692  |              |       |              |       | 0.0212       | 0.25 | 0.0041          | 9.69 | 0.0074         | 6.5  |                |      |
| Dodecanoic acid, trimethylsilyl ester                                           | 0.0812  |              |       | 0.0024       | 0.07  |              |      |                 |      |                |      | 0.0244         | 2.92 |
| l-Alanine, trimethylsilyl ester                                                 | 0.0812  | 0.0061       | 2.75  | 0.0076       | 2.92  |              |      |                 |      |                |      |                |      |
| n-Pentadecanoic acid, trimethylsilyl ester                                      | 0.0812  |              |       | 0.0267       | 0.5   |              |      |                 |      | 0.0049         | 0.36 |                |      |
| Heptadecanoic acid, trimethylsilyl ester                                        | 0.0844  |              |       | 0.0335       | 0.51  |              |      | 0.0328          | 0.4  | 0.0030         | 0.28 |                |      |

**Table S3.** List of 13 metabolites exhibiting significant (FDR,  $\leq 0.1$ , and FC,  $\geq 1.5$ ) differences in abundance changes between healthy controls (HCs) and the three subgroups of IBS patients after treatment (IBS-M II, IBS-D II, and IBS-C II). Positions marked in bold indicate metabolites that also differed significantly before treatment.

| Metabolite name                                                                | ANOVA   | IBS-D II vs. HC |      | IBS-M II vs. HC |      | IBS-C II vs. HC |     | IBS-D II vs. IBS-C |     | IBS-M II vs IBS-C |     | IBS-D II vs IBS-M |     |
|--------------------------------------------------------------------------------|---------|-----------------|------|-----------------|------|-----------------|-----|--------------------|-----|-------------------|-----|-------------------|-----|
|                                                                                | p-value | p-value         | FC   | p-value         | FC   | p-value         | FC  | p-value            | FC  | p-value           | FC  | p-value           | FC  |
| Propanoic acid, 2-(methoxyimino)-, trimethylsilyl ester                        | 0.0011  | 0.0070          | 0.7  | 0.0000          | 0.4  | 0.0027          | 0.6 |                    |     |                   |     | 0.0133            | 1.5 |
| Nonanoic acid, trimethylsilyl ester                                            | 0.0455  | 0.0013          | 0.3  |                 |      |                 |     |                    |     |                   |     | 0.0021            | 0.5 |
| <b>Pyrimidine, 2,4-bis(trimethylsilyloxy)-</b>                                 | 0.0455  |                 |      | 0.0001          | 5.6  | 0.0021          | 6.0 |                    |     |                   |     |                   |     |
| <b>N,O-Bis(trimethylsilyl)phenylalanine</b>                                    | 0.0455  | 0.0016          | 9.1  | 0.0017          | 13.0 | 0.0019          | 4.3 |                    |     |                   |     |                   |     |
| Pentasiloxane, dodecamethyl-                                                   | 0.0455  | 0.0289          | 0.7  |                 |      |                 |     |                    |     | 0.0233            | 2.2 | 0.0040            | 0.5 |
| <b>d-Glucose, 2,3,4,5,6-pentakis-O-(trimethylsilyl)-, o-methyloxyme, (1Z)-</b> | 0.0455  | 0.0068          | 13.5 | 0.0007          | 10.6 | 0.0228          | 3.4 |                    |     |                   |     |                   |     |
| <b>1H-Indole, 3-methyl-1-(trimethylsilyl)-</b>                                 | 0.0455  | 0.0124          | 3.8  | 0.0010          | 3.7  | 0.0117          | 2.6 |                    |     |                   |     |                   |     |
| <b>2-Desoxy-pentos-3-ulose, bis(methoxime),O,O'-bis(trimethylsilyl)-</b>       | 0.0455  |                 |      | 0.0024          | 0.5  |                 |     |                    |     | 0.0222            | 0.3 | 0.0103            | 3.0 |
| 1,2-Benzenediol bis(trimethylsilyl) ether                                      | 0.0455  |                 |      | 0.0640          | 1.6  | 0.0338          | 0.7 |                    |     | 0.0045            | 2.3 | 0.0109            | 0.6 |
| Cyclopentanecarboxylic acid, 1-amino-, bis(trimethylsilyl) deriv.              | 0.0455  | 0.0179          | 2.9  | 0.0031          | 3.1  |                 |     | 0.0591             | 2.8 | 0.0172            | 3.1 |                   |     |
| <b>Tocopherol-<math>\tau</math>-tms-derivative</b>                             | 0.0455  | 0.0002          | 0.3  |                 |      |                 |     | 0.0017             | 0.3 |                   |     |                   |     |
| <b>Heptadecanoic acid, trimethylsilyl ester</b>                                | 0.0491  | 0.0102          | 0.3  | 0.0444          | 0.6  |                 |     | 0.0091             | 0.3 | 0.0327            | 0.6 |                   |     |
| <b>n-Pentadecanoic acid, trimethylsilyl ester</b>                              | 0.0617  |                 |      | 0.0076          | 0.4  |                 |     |                    |     | 0.0149            | 0.4 |                   |     |
